# Supplementary material
Source: Springer Nature journal article supplement (https://www.springermedizin.de/resource/supplementary/12936_2005_174_MOESM6_ESM.pdf/9547054)

**FST/(1-FST) against ln distance.**

$$y = 0.0065x + 0.0356$$

$$R^2 = 0.0254$$

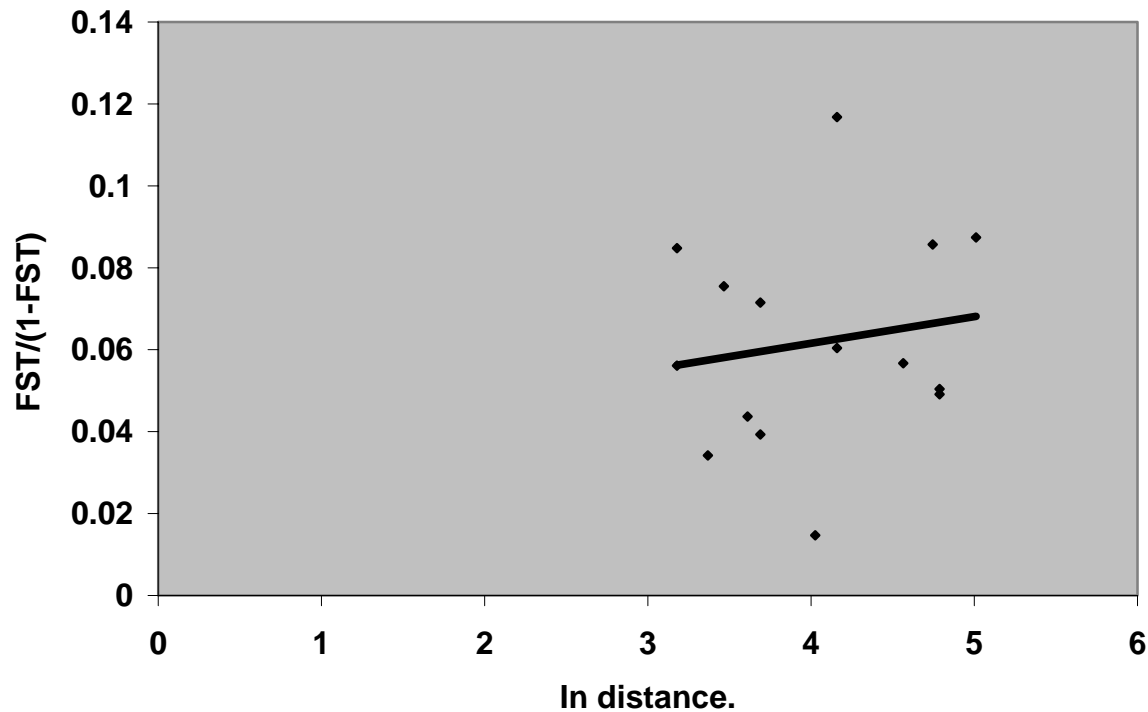

Supplement: MOESM6 [file 9547054]
